# Supplementary material for: Oxygen removal from intact biomass to produce liquid fuel range hydrocarbons via fast-hydropyrolysis and vapor-phase catalytic hydrodeoxygenation
Source: Royal Society of Chemistry journal article supplement (doi:10.1039/c4gc01746c), 2014-10-06
Supplement: c4gc01746c1.pdf [file c4gc01746c1.pdf]

**Supplementary Information**

**Oxygen removal from intact biomass to produce liquid fuel range  
hydrocarbons via fast-hydropyrolysis and vapor-phase catalytic  
hydrodeoxygenation**

Vinod Kumar Venkatakrishnan,<sup>a,b</sup>

W. Nicholas Delgass,<sup>a,b</sup> Fabio H. Ribeiro,<sup>a,b</sup> and Rakesh Agrawal<sup>a,b,\*</sup>

<sup>a</sup> School of Chemical Engineering, Purdue University, West Lafayette, IN 47907, USA

<sup>b</sup> Center for Direct Catalytic Conversion of Biomass to Biofuels (C3Bio), Bindley Bioscience Center, Discovery Park, West Lafayette, IN 47907, USA

\* To whom correspondence should be addressed. Email: [agrawalr@purdue.edu](mailto:agrawalr@purdue.edu)

## Materials

The microcrystalline cellulose (50 $\mu$ m) was purchased from Sigma-Aldrich (St. Louis, MO, USA). The poplar feedstock (termed BESC standard poplar) was a genotype of *Populus trichocarpa* grown at Oak Ridge National Laboratory.<sup>1</sup> The poplar feedstock, which was dried and milled to less than 80 mesh (< 0.177 mm), was obtained from National Renewable Energy Laboratory (NREL). The poplar feedstock was then sieved to pass through a 270 mesh screen for a particle size of <53  $\mu$ m, comparable to the microcrystalline cellulose, for the experiments reported in this manuscript. Ultra high purity (99.999%) hydrogen and high purity (99.995%) nitrogen purchased from Indiana Oxygen Company (Indianapolis, IN, USA) were used for the experiments.

**Table S.1:** Ultimate and proximate analysis of cellulose and poplar feedstocks

| Ultimate Analysis                 |           |        |
|-----------------------------------|-----------|--------|
|                                   | Cellulose | Poplar |
| Carbon / %wt (dry)                | 44.70     | 50.72  |
| Hydrogen / %wt (dry)              | 6.31      | 5.88   |
| Nitrogen / %wt (dry)              | 0.19      | 0.14   |
| Sulfur / %wt (dry)                | <0.01     | <0.01  |
| Ash / %wt (dry)                   | 0.04      | 1.89   |
| Oxygen / %wt (dry), by difference | 48.76     | 41.37  |
| Proximate Analysis                |           |        |
| Moisture / % wt as used           | 0.94      | 3.32   |
| Volatile Matter / %wt (dry)       | 98.24     | 88.63  |
| Fixed Carbon / %wt (dry)          | 1.72      | 9.48   |
| HHV / BTU lb <sup>-1</sup>        | 6963      | 8153   |

**Table S.2:** Compositional analysis of the poplar feedstock, % wt (dry)

|                       | Poplar |
|-----------------------|--------|
| Cellulose             | 44.5   |
| Xylan                 | 14.0   |
| Arabinan              | 0.2    |
| Galactan              | 1.1    |
| Mannan                | 2.6    |
| Hemicellulose (total) | 17.9   |
| Lignin                | 26.3   |
| Extractives           | 3.1    |
| Acetate               | 3.6    |

**Table S.3:** Overall product distribution from cellulose and poplar on % carbon in feed basis (data as shown in Figure 2) and estimated hydrogen consumption

|                                                                                                                                     | Cellulose   | Poplar      |
|-------------------------------------------------------------------------------------------------------------------------------------|-------------|-------------|
| CO / % carbon in feed                                                                                                               | 15.6        | 9.6         |
| CO <sub>2</sub> / % carbon in feed                                                                                                  | 2.0         | 2.7         |
| Char / % carbon in feed                                                                                                             | 3.4         | 28.5        |
| Aqueous phase / % carbon in feed                                                                                                    | 0.9         | 0.4         |
| Product Hydrocarbons Yield / % carbon in feed                                                                                       |             |             |
| Methane (C <sub>1</sub> )                                                                                                           | 5.3         | 9.8         |
| Ethane (C <sub>2</sub> )                                                                                                            | 6.1         | 6.9         |
| Propane (C <sub>3</sub> )                                                                                                           | 6.2         | 5.0         |
| <b>Total (C<sub>1</sub> - C<sub>3</sub>) range</b>                                                                                  | <b>17.6</b> | <b>21.7</b> |
| i-butane                                                                                                                            | 0.3         | 0.4         |
| n-butane                                                                                                                            | 7.9         | 5.3         |
| <b>Total C<sub>4</sub></b>                                                                                                          | <b>8.2</b>  | <b>5.7</b>  |
| 2-methyl butane                                                                                                                     | 0.8         | 0.5         |
| n-pentane                                                                                                                           | 10.9        | 3.0         |
| cyclopentane                                                                                                                        | 4.5         | 3.0         |
| <b>Total C<sub>5</sub></b>                                                                                                          | <b>16.2</b> | <b>6.5</b>  |
| n-hexane                                                                                                                            | 17.6        | 1.1         |
| cyclohexane                                                                                                                         | 1.6         | 2.6         |
| Other C <sub>6</sub> branched and cyclic isomers                                                                                    | 4.0         | 1.2         |
| <b>Total C<sub>6</sub></b>                                                                                                          | <b>23.2</b> | <b>4.9</b>  |
| (Mixture of n-heptane, methylcyclohexane, other branched and cyclic isomers) <b>Total C<sub>7</sub></b>                             | <b>1.9</b>  | <b>2.8</b>  |
| (Mixture of n-octane, ethylcyclohexane, n-nonane, propylcyclohexane, other branched and cyclic isomers) <b>Total C<sub>8+</sub></b> | <b>5.5</b>  | <b>12.2</b> |
| <b>Total C<sub>4+</sub> range</b>                                                                                                   | <b>55.0</b> | <b>32.1</b> |
| <b>Total hydrocarbons (C<sub>1</sub> - C<sub>8+</sub>)</b>                                                                          | <b>72.6</b> | <b>53.8</b> |
| Overall carbon balance                                                                                                              | 94.5        | 95.0        |
| Unaccounted carbon                                                                                                                  | 5.5         | 5.0         |
| Estimated hydrogen consumption / g <sub>H2</sub> g <sub>feed</sub> <sup>-1</sup>                                                    | ~0.05       | ~0.05       |

**Table S.4:** Carbon and hydrogen contents of char from cellulose and poplar experiments

|                | Cellulose | Poplar |
|----------------|-----------|--------|
| Carbon / wt%   | 80.9      | 76.3   |
| Hydrogen / wt% | 3.6       | 3.7    |

**Table S.5:** Carbon, hydrogen and water contents of aqueous phase products from cellulose and poplar experiments

|                | Cellulose | Poplar |
|----------------|-----------|--------|
| Carbon / wt%   | 2.2       | 1.1    |
| Hydrogen / wt% | 11.3      | 11.8   |
| Water / wt%    | 91.2      | 97.2   |

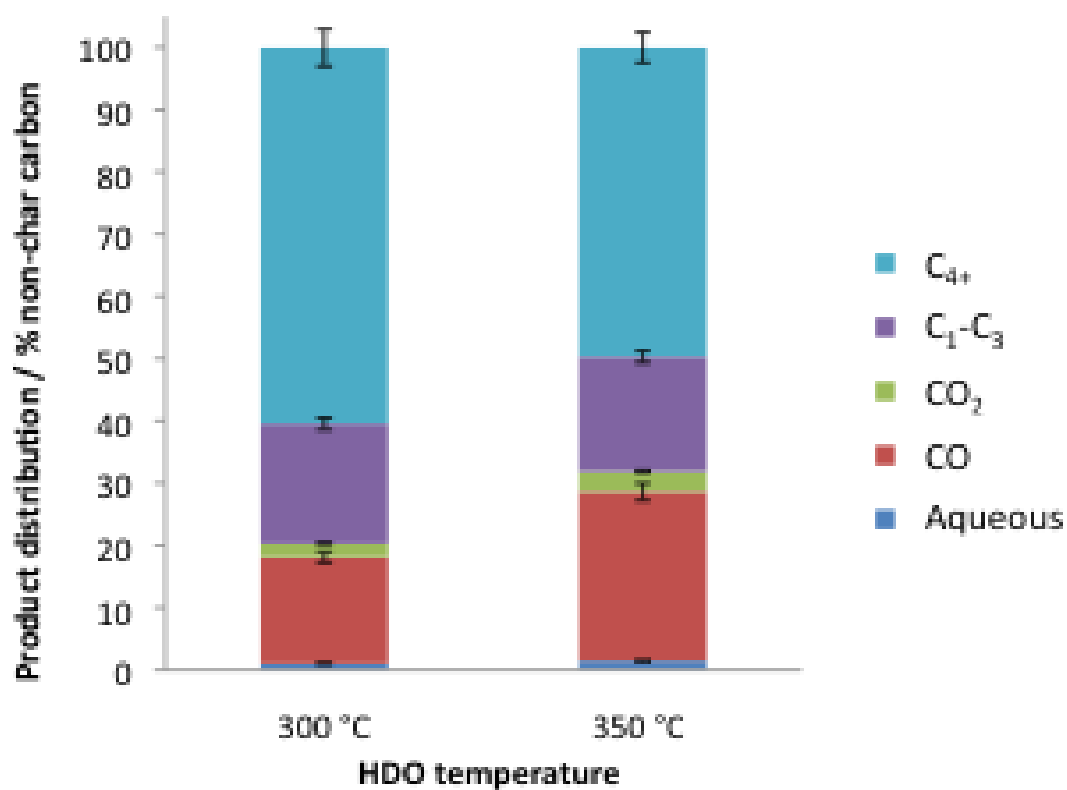

**Figure S.1:** Comparison of product distribution (% non-char carbon basis) from HDO of cellulose fast-hydropyrolysis vapors as a function of HDO temperature. Process conditions:  $P_{H_2}$ =25 bar,  $P_{N_2}$ = 2 bar,  $P_{total}$ =27 bar, fast-hydropyrolysis=480°C

## Catalyst Characterization

CO chemisorption was performed to quantify CO uptake for the 5wt%Pt-2.5wt%Mo/MWCNT catalyst. ~124 mg of the fresh, as-prepared and reduced, catalyst was loaded into a Micromeritics ASAP 2020 instrument. The catalyst was degassed and reduced *in situ*, in H<sub>2</sub> flow, with a temperature ramp to 450 °C in 2 hours and held at 450 °C for 2 hours, similar to the *in situ* catalyst reduction procedure used in the HDO reactor before the start of the experiments. The catalyst was then evacuated at 450°C for 2 hours and a leak test was performed at 35°C, to ensure that the pressure increase rate, due to sample outgassing, was less than 10 µmHg min<sup>-1</sup>. The CO uptake analysis was performed at 35°C and in a pressure range of 200 mmHg to 400 mmHg.

The CO uptake value for the 5wt%Pt-2.5wt%Mo/MWCNT catalyst was ~67 µmol g<sup>-1</sup> and the corresponding isotherm is shown in Figure S.2.

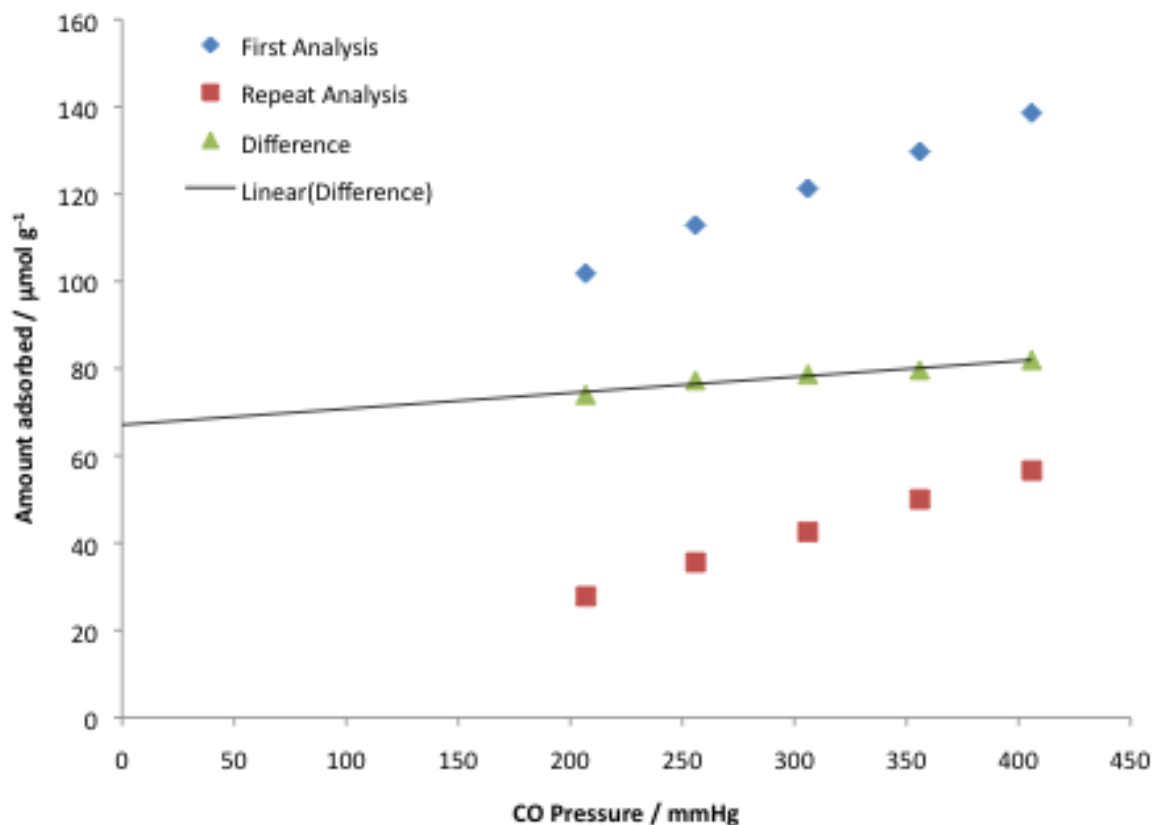

**Figure S.2:** CO chemisorption isotherm

## References

1. M. H. Studer, S. Brethauer, J. D. DeMartini, H. L. McKenzie and C. E. Wyman, *Biotechnol. Biofuels*, 2011, 4, 19.
